# Supplementary material
Source: HighWire-hosted journal article supplement (https://bmjopen.bmj.com/content/9/11/e031126)
Supplement: inline-supplementary-material-1 [file inline-supplementary-material-1.pdf]

## Supplementary Files

**Table S1 Different Characteristics of Systolic Blood Pressure of Migrant Workers in China**

| Characteristics                           | sleep duration (h) |              |              |              |              | P value |
|-------------------------------------------|--------------------|--------------|--------------|--------------|--------------|---------|
|                                           | <6                 | 6            | 7            | 8            | ≥9           |         |
| Sex                                       |                    |              |              |              |              |         |
| Male                                      | 127.94±16.49       | 126.30±15.11 | 125.54±14.50 | 125.31±14.89 | 123.99±13.77 | <.0001  |
| Female                                    | 118.61±16.77       | 116.26±16.43 | 114.88±14.98 | 114.04±14.34 | 112.90±13.87 | <.0001  |
| Age(y)                                    |                    |              |              |              |              |         |
| 18-44                                     | 121.85±15.65       | 121.04±15.25 | 120.14±14.72 | 119.19±14.99 | 117.59±14.05 | <.0001  |
| 45-59                                     | 132.26±19.33       | 131.89±17.99 | 130.62±18.23 | 131.01±18.09 | 131.55±18.38 | 0.3477  |
| Marital status                            |                    |              |              |              |              |         |
| Unmarried                                 | 121.10±16.28       | 117.80±13.98 | 117.21±12.62 | 115.91±12.84 | 115.02±12.52 | <.0001  |
| Married/ cohabitating                     | 124.95±17.22       | 124.13±16.59 | 122.58±16.08 | 121.69±16.14 | 120.09±15.45 | <.0001  |
| Widowed / divorced/ separated             | 124.41±18.58       | 120.81±14.40 | 120.78±16.30 | 119.54±19.42 | 119.41±17.09 | 0.1310  |
| Educational level                         |                    |              |              |              |              |         |
| Illiterate or Primary school              | 124.33±16.58       | 124.37±17.44 | 122.14±16.10 | 122.58±16.50 | 121.22±16.02 | 0.0005  |
| Junior high school                        | 124.31±17.22       | 122.97±16.63 | 122.28±15.61 | 121.00±15.78 | 119.39±14.74 | <.0001  |
| Senior high school                        | 125.36±17.30       | 123.23±15.98 | 121.30±15.94 | 120.17±15.80 | 117.94±14.77 | <.0001  |
| College graduate or above                 | 123.12±18.00       | 121.01±14.63 | 119.83±14.68 | 117.76±14.45 | 115.67±13.75 | <.0001  |
| Industry sector                           |                    |              |              |              |              |         |
| Manufacturing                             | 124.66±16.03       | 122.83±16.45 | 121.14±15.32 | 119.71±15.81 | 117.77±14.22 | <.0001  |
| Wholesale and retail trade                | 123.82±18.35       | 121.45±15.16 | 121.09±15.84 | 119.69±15.66 | 119.02±15.32 | <.0001  |
| Accommodation and catering                | 122.99±17.94       | 120.85±16.48 | 120.31±15.39 | 118.56±14.89 | 116.69±14.41 | <.0001  |
| Services                                  | 122.16±16.89       | 121.44±15.93 | 120.05±16.09 | 118.63±15.15 | 116.30±14.26 | <.0001  |
| Construction                              | 127.35±18.30       | 126.21±17.07 | 125.16±15.78 | 124.77±15.52 | 123.54±15.37 | 0.0001  |
| Other                                     | 124.93±16.68       | 124.86±16.44 | 122.08±15.29 | 121.86±15.75 | 120.07±15.36 | <.0001  |
| Annual household income(RMB,in quartiles) |                    |              |              |              |              |         |
| <20000                                    | 123.23±17.75       | 120.46±16.88 | 119.35±15.69 | 118.32±16.08 | 116.80±15.45 | <.0001  |
| 20000~                                    | 122.33±17.25       | 122.13±16.28 | 120.35±15.74 | 118.94±15.48 | 117.87±14.61 | <.0001  |
| 26000~                                    | 124.38±16.62       | 122.40±16.06 | 120.95±14.87 | 119.79±15.47 | 118.34±14.46 | <.0001  |
| ≥36000                                    | 126.58±16.73       | 125.08±15.70 | 123.52±15.43 | 122.81±15.28 | 121.09±14.45 | <.0001  |
| Inflow area                               |                    |              |              |              |              |         |
| South                                     | 122.25±16.15       | 121.01±15.58 | 119.17±14.94 | 118.29±15.37 | 116.65±14.49 | <.0001  |
| North                                     | 126.65±18.04       | 124.74±16.74 | 123.53±15.88 | 122.19±15.76 | 120.57±14.91 | <.0001  |
| Migration time (year)                     |                    |              |              |              |              |         |
| <2                                        | 122.30±14.99       | 121.10±15.80 | 120.07±15.16 | 118.71±15.16 | 116.87±13.92 | <.0001  |
| 2~                                        | 123.72±18.06       | 123.11±16.84 | 120.99±15.32 | 119.69±15.02 | 117.99±14.86 | <.0001  |
| 4.5~                                      | 125.13±17.33       | 122.49±15.98 | 123.31±15.44 | 120.24±15.70 | 118.55±14.60 | <.0001  |

|                                           |              |              |              |              |              |        |
|-------------------------------------------|--------------|--------------|--------------|--------------|--------------|--------|
| ≥10                                       | 125.67±17.63 | 124.19±16.26 | 122.92±16.11 | 122.67±16.65 | 121.84±15.90 | <.0001 |
| Working hours(h)                          |              |              |              |              |              |        |
| <8                                        | 126.96±17.73 | 123.57±17.17 | 121.93±16.54 | 119.85±17.28 | 117.25±14.38 | <.0001 |
| 8~                                        | 123.60±17.41 | 123.09±16.23 | 121.61±15.47 | 120.24±15.63 | 118.58±15.07 | <.0001 |
| ≥10                                       | 124.99±16.75 | 122.49±16.20 | 120.94±15.55 | 120.50±15.45 | 119.12±14.57 | <.0001 |
| Total static behavior time (h)            |              |              |              |              |              |        |
| <4                                        | 124.20±16.97 | 123.00±16.34 | 121.81±15.63 | 121.08±15.89 | 119.49±15.09 | <.0001 |
| ≥4                                        | 124.57±17.45 | 122.83±16.22 | 121.10±15.52 | 119.70±15.50 | 118.02±14.71 | <.0001 |
| BMI                                       |              |              |              |              |              |        |
| <18.5                                     | 122.33±16.80 | 120.31±16.20 | 118.43±14.83 | 117.47±15.09 | 116.34±14.30 | <.0001 |
| 18.5-23.9                                 | 126.73±16.64 | 126.23±14.92 | 125.50±14.72 | 124.76±14.69 | 123.84±14.20 | <.0001 |
| ≥24                                       | 128.15±18.38 | 132.94±16.69 | 134±16.72    | 134.29±16.37 | 133.28±14.85 | 0.5585 |
| Smoking status                            |              |              |              |              |              |        |
| Non-current smoker                        | 126.36±16.30 | 125.48±14.94 | 124.75±14.41 | 124.56±15.07 | 122.99±14.19 | <.0001 |
| Current smoker                            | 123.06±17.66 | 121.14±16.91 | 119.66±15.88 | 118.39±15.57 | 116.78±14.79 | <.0001 |
| Alcohol consumption in the past 12 months |              |              |              |              |              |        |
| Never drinking                            | 122.45±18.35 | 120.43±17.07 | 119.12±15.43 | 117.99±15.26 | 116.60±14.60 | <.0001 |
| Drinking but not excessive                | 123.94±15.71 | 122.99±14.87 | 121.92±14.98 | 121.39±15.25 | 119.47±14.50 | <.0001 |
| Excessive drinking                        | 130.19±16.16 | 129.91±16.02 | 128.97±16.14 | 128.43±16.74 | 126.85±15.25 | 0.0011 |
| Vegetable and fruit intake                |              |              |              |              |              |        |
| Insufficient intake                       | 123.92±17.08 | 123.32±16.64 | 121.67±15.31 | 120.62±15.75 | 119.16±14.82 | <.0001 |
| Adequate intake                           | 124.72±17.29 | 122.58±15.97 | 121.21±15.76 | 120.04±15.62 | 118.24±14.93 | <.0001 |
| Red meat intake                           |              |              |              |              |              |        |
| Normal intake                             | 123.79±17.85 | 123.24±17.04 | 121.18±16.04 | 120.47±15.69 | 118.89±15.05 | <.0001 |
| Excessive intake                          | 124.83±16.67 | 122.67±15.70 | 121.59±15.23 | 120.16±15.68 | 118.46±14.76 | <.0001 |
| Participants with diabetes                |              |              |              |              |              |        |
| Yes                                       | 142.24±19.33 | 125.88±17.70 | 135.37±19.20 | 133.82±17.38 | 130.96±16.94 | 0.0082 |
| No                                        | 123.94±16.92 | 122.62±16.12 | 121.24±15.44 | 120.12±15.58 | 118.50±14.80 | <.0001 |
| Stroke patients                           |              |              |              |              |              |        |
| Yes                                       | 143.36±15.16 | 141.18±21.63 | 133.64±24.18 | 129.38±23.67 | 140.08±29.82 | 0.3000 |
| No                                        | 124.30±17.17 | 122.88±16.25 | 121.41±15.56 | 120.28±15.67 | 118.63±14.86 | <.0001 |
| Myocardial infarction patients            |              |              |              |              |              |        |
| Yes                                       | 124.34±16.24 | 136.88±14.28 | 133.35±28.11 | 127.84±20.35 | 137.38±17.73 | 0.5786 |
| No                                        | 124.38±17.21 | 122.90±16.28 | 121.41±15.56 | 120.28±15.67 | 118.63±14.88 | <.0001 |
| Total                                     | 124.38±17.20 | 122.91±16.28 | 121.42±15.58 | 120.29±15.68 | 118.64±14.89 | <.0001 |

Note: Data were expressed as ( $\bar{x} \pm s$  (mm Hg))

The *p*-values were calculated from weighted linear regression to test for differences across sleep duration categories.

**Table S2 Different Characteristics of Diastolic Blood Pressure of Migrant Workers in China**

| Characteristics                             | sleep duration (h) |             |             |             |             | P value |
|---------------------------------------------|--------------------|-------------|-------------|-------------|-------------|---------|
|                                             | <6                 | 6           | 7           | 8           | ≥9          |         |
| Sex                                         |                    |             |             |             |             |         |
| Male                                        | 81.46±12.38        | 80.24±11.31 | 79.59±11.27 | 79.52±11.19 | 78.04±10.86 | <.0001  |
| Female                                      | 76.77±10.61        | 75.07±10.99 | 74.57±10.29 | 74.49±10.22 | 73.46±9.80  | <.0001  |
| Age(y)                                      |                    |             |             |             |             |         |
| 18-44                                       | 78.14±11.43        | 77.26±10.96 | 76.77±10.77 | 76.60±10.76 | 75.15±10.20 | <.0001  |
| 45-59                                       | 84.43±12.32        | 84.40±12.01 | 83.99±11.98 | 83.97±11.64 | 84.24±11.94 | 0.4899  |
| Marital status                              |                    |             |             |             |             |         |
| Unmarried                                   | 74.58±12.76        | 73.11±9.72  | 72.94±9.32  | 72.90±9.27  | 71.86±8.75  | 0.0008  |
| Married/ cohabitating                       | 80.62±11.73        | 79.75±11.50 | 78.95±11.29 | 78.68±11.18 | 77.45±10.86 | <.0001  |
| Widowed / divorced/ separated               | 78.61±8.96         | 76.98±10.85 | 76.94±11.33 | 76.65±12.46 | 75.56±11.25 | 0.1556  |
| Educational level                           |                    |             |             |             |             |         |
| Illiterate or Primary school                | 78.83±10.77        | 78.76±11.47 | 78.30±11.45 | 78.59±11.45 | 77.25±10.87 | 0.0189  |
| Junior high school                          | 79.45±11.82        | 78.39±11.74 | 77.87±11.25 | 77.33±11.05 | 76.15±10.75 | <.0001  |
| Senior high school                          | 80.82±12.51        | 78.80±11.19 | 77.42±11.45 | 77.27±11.28 | 75.37±10.55 | <.0001  |
| College graduate or above                   | 79.97±13.27        | 78.02±11.26 | 77.23±10.78 | 76.43±10.44 | 74.52±9.94  | <.0001  |
| Industry sector                             |                    |             |             |             |             |         |
| Manufacturing                               | 79.87±11.64        | 78.24±11.31 | 77.30±11.24 | 76.77±10.90 | 73.21±10.30 | <.0001  |
| Wholesale and retail trade                  | 79.28±12.33        | 77.69±11.09 | 77.71±11.07 | 77.38±11.20 | 76.54±11.01 | 0.0045  |
| Accommodation and catering                  | 78.54±12.23        | 77.10±11.12 | 76.94±10.96 | 76.01±11.05 | 74.43±10.53 | <.0001  |
| Services                                    | 78.40±11.99        | 78.15±11.54 | 77.16±11.34 | 76.63±10.87 | 75.05±10.19 | <.0001  |
| Construction                                | 81.15±12.69        | 80.14±12.40 | 80.10±11.86 | 79.71±11.18 | 78.95±11.15 | 0.0043  |
| Other                                       | 80.25±11.45        | 79.83±11.64 | 77.88±10.80 | 78.07±11.01 | 76.19±10.49 | <.0001  |
| Annual household income (RMB, in quartiles) |                    |             |             |             |             |         |
| <20000                                      | 78.85±11.71        | 76.82±11.18 | 76.56±11.05 | 76.19±11.18 | 74.68±10.73 | <.0001  |
| 20000~                                      | 78.94±11.40        | 77.91±11.32 | 76.89±11.09 | 76.44±10.90 | 75.28±10.26 | <.0001  |
| 26000~                                      | 79.25±11.02        | 77.61±11.58 | 76.88±10.83 | 76.71±10.86 | 75.71±10.30 | 0.0003  |
| ≥36000                                      | 80.91±12.72        | 80.13±11.48 | 79.09±11.28 | 78.85±10.98 | 77.38±10.74 | <.0001  |
| Inflow area                                 |                    |             |             |             |             |         |
| South                                       | 78.11±11.12        | 77.36±11.24 | 76.12±10.75 | 76.10±10.77 | 74.76±10.38 | <.0001  |
| North                                       | 81.35±12.62        | 79.60±11.62 | 79.09±11.38 | 78.43±11.21 | 76.90±10.76 | <.0001  |
| Migration time (year)                       |                    |             |             |             |             |         |
| <2                                          | 77.66±10.77        | 76.36±10.50 | 75.94±11.11 | 75.66±10.81 | 73.74±10.11 | <.0001  |
| 2~                                          | 78.73±12.92        | 78.36±11.72 | 77.11±10.68 | 76.76±10.65 | 75.30±10.25 | <.0001  |
| 4.5~                                        | 81.32±11.19        | 78.47±11.40 | 77.84±11.20 | 77.58±10.99 | 76.09±10.36 | <.0001  |
| ≥10                                         | 80.52±12.18        | 79.90±11.68 | 79.23±11.42 | 79.23±11.54 | 78.84±11.28 | 0.0136  |
| Working hours(h)                            |                    |             |             |             |             |         |
| <8                                          | 81.05±11.14        | 79.14±11.06 | 77.79±11.75 | 77.40±11.70 | 74.77±10.21 | <.0001  |
| 8~                                          | 79.44±11.97        | 78.78±11.28 | 77.93±11.06 | 77.35±10.94 | 75.79±10.61 | <.0001  |
| ≥10                                         | 79.72±12.08        | 77.90±11.81 | 77.07±11.24 | 77.10±11.24 | 76.19±10.70 | <.0001  |

|                                           |             |             |             |             |              |        |
|-------------------------------------------|-------------|-------------|-------------|-------------|--------------|--------|
| Total static behavior time (h)            |             |             |             |             |              |        |
| <4                                        | 79.24±11.95 | 78.00±11.61 | 77.69±11.24 | 77.37±11.13 | 76.07±10.71  | <.0001 |
| ≥4                                        | 80.12±11.95 | 78.93±11.32 | 77.61±11.12 | 77.21±11.00 | 75.66±10.54  | <.0001 |
| BMI                                       |             |             |             |             |              |        |
| <18.5                                     | 77.93±11.55 | 76.40±11.13 | 75.40±10.56 | 75.33±10.63 | 74.23±10.12  | <.0001 |
| 18.5-23.9                                 | 81.81±11.36 | 81.02±10.80 | 80.67±10.56 | 80.31±10.35 | 79.41±10.31  | <.0001 |
| ≥24                                       | 90.40±13.69 | 87.21±11.49 | 87.85±11.96 | 87.41±11.80 | 86.25±11.28  | 0.1265 |
| Smoking status                            |             |             |             |             |              |        |
| Non-current smoker                        | 80.46±12.12 | 79.67±11.40 | 78.80±11.19 | 78.91±11.33 | 77.32±11.10  | <.0001 |
| Current smoker                            | 79.14±11.82 | 77.68±11.44 | 77.04±11.12 | 76.56±10.85 | 75.19±10.33  | <.0001 |
| Alcohol consumption in the past 12 months |             |             |             |             |              |        |
| Never drinking                            | 78.76±11.68 | 76.82±11.15 | 76.39±10.68 | 76.21±10.53 | 74.95±10.23  | <.0001 |
| Drinking but not excessive                | 78.92±11.87 | 78.31±11.05 | 77.67±11.16 | 77.41±11.08 | 75.86±10.58  | <.0001 |
| Excessive drinking                        | 83.60±12.07 | 83.94±11.99 | 82.90±11.73 | 82.84±12.15 | 80.95±11.53  | 0.0005 |
| Vegetable and fruit intake                |             |             |             |             |              |        |
| Insufficient intake                       | 79.48±11.77 | 78.65±11.57 | 77.83±10.99 | 77.46±11.13 | 75.95±10.55  | <.0001 |
| Adequate intake                           | 79.81±12.10 | 78.36±11.38 | 77.49±11.30 | 77.14±11.00 | 75.74±10.66  | <.0001 |
| Red meat intake                           |             |             |             |             |              |        |
| Normal intake                             | 79.54±12.09 | 78.64±11.61 | 77.58±11.19 | 77.42±10.92 | 76.03±10.41  | <.0001 |
| Excessive intake                          | 79.77±11.86 | 78.38±11.36 | 77.70±11.16 | 77.18±11.15 | 765.69±10.76 | <.0001 |
| Participants with diabetes                |             |             |             |             |              |        |
| Yes                                       | 89.84±16.44 | 86.59±10.07 | 86.70±10.57 | 85.63±10.02 | 84.92±10.88  | 0.1093 |
| No                                        | 79.42±11.72 | 78.31±11.43 | 77.53±11.13 | 77.17±11.03 | 75.73±10.57  | <.0001 |
| Stroke patients                           |             |             |             |             |              |        |
| Yes                                       | 87.03±7.41  | 92.15±10.98 | 83.39±14.71 | 83.27±11.29 | 85.71±19.36  | 0.2823 |
| No                                        | 79.64±11.96 | 78.47±11.45 | 77.64±11.17 | 77.27±11.05 | 75.83±10.60  | <.0001 |
| Myocardial infarction patients            |             |             |             |             |              |        |
| Yes                                       | 80.93±6.15  | 86.28±9.59  | 88.94±14.26 | 85.55±15.95 | 89.76±8.71   | 0.2591 |
| No                                        | 79.66±11.98 | 78.48±11.47 | 77.64±11.17 | 77.27±11.05 | 75.83±10.61  | <.0001 |
| Total                                     | 79.67±11.96 | 78.49±11.47 | 77.65±11.17 | 77.28±11.06 | 75.83±10.61  | <.0001 |

Note: Data were expressed as ( $\bar{x} \pm s$  (mm Hg))

The *p*-values were calculated from weighted linear regression to test for differences across sleep duration categories.

**Table S3 Different Characteristics of Pulse Pressure  
of Migrant Workers in China**

| Characteristics                             | sleep duration (h) |             |             |             |             | P value |
|---------------------------------------------|--------------------|-------------|-------------|-------------|-------------|---------|
|                                             | <6                 | 6           | 7           | 8           | ≥9          |         |
| Sex                                         |                    |             |             |             |             |         |
| Male                                        | 46.48±9.90         | 46.06±9.39  | 45.95±8.93  | 45.80±9.45  | 45.95±9.35  | 0.2238  |
| Female                                      | 41.84±10.38        | 41.19±9.62  | 40.32±8.96  | 39.55±8.84  | 39.44±8.92  | <.0001  |
| Age(y)                                      |                    |             |             |             |             |         |
| 18-44                                       | 43.71±9.75         | 43.78±9.42  | 43.38±9.11  | 42.61±9.45  | 42.44±9.49  | <.0001  |
| 45-59                                       | 47.82±11.45        | 47.49±10.63 | 46.63±10.50 | 47.04±11.04 | 47.31±11.07 | 0.4204  |
| Marital status                              |                    |             |             |             |             |         |
| Unmarried                                   | 46.52±9.28         | 44.69±9.78  | 44.27±9.37  | 43.01±9.61  | 43.16±9.81  | <.0001  |
| Married/ cohabitating                       | 44.33±10.19        | 44.38±9.74  | 43.64±9.36  | 43.02±9.68  | 42.64±9.63  | <.0001  |
| Widowed / divorced/ separated               | 45.80±14.64        | 43.84±9.47  | 43.84±8.86  | 42.89±11.40 | 43.86±10.63 | 0.3513  |
| Educational level                           |                    |             |             |             |             |         |
| Illiterate or Primary school                | 45.50±11.32        | 45.61±10.53 | 43.84±9.76  | 43.99±9.92  | 43.97±10.51 | 0.0042  |
| Junior high school                          | 44.85±10.11        | 44.58±9.43  | 44.41±9.31  | 43.69±9.88  | 43.24±9.68  | <.0001  |
| Senior high school                          | 44.53±10.08        | 44.43±10.14 | 43.87±9.54  | 42.90±9.73  | 42.57±9.52  | <.0001  |
| College graduate or above                   | 43.15±9.50         | 43.00±8.88  | 42.60±8.88  | 41.34±8.92  | 41.15±9.04  | <.0001  |
| Industry sector                             |                    |             |             |             |             |         |
| Manufacturing                               | 44.79±9.42         | 44.59±9.97  | 43.85±9.21  | 42.95±9.77  | 42.56±9.49  | <.0001  |
| Wholesale and retail trade                  | 44.54±11.52        | 43.75±8.75  | 43.38±9.39  | 42.30±9.48  | 42.48±9.66  | <.0001  |
| Accommodation and catering                  | 44.45±10.67        | 43.75±10.03 | 43.36±9.19  | 42.58±9.34  | 42.26±9.50  | <.0001  |
| Services                                    | 43.76±10.59        | 43.29±9.69  | 42.88±9.65  | 42.04±9.25  | 41.25±9.21  | <.0001  |
| Construction                                | 46.20±10.95        | 46.07±10.06 | 45.06±9.31  | 45.06±9.86  | 44.59±9.78  | 0.0041  |
| Other                                       | 44.68±9.68         | 45.03±9.94  | 44.20±9.45  | 43.78±9.95  | 43.86±10.20 | 0.0108  |
| Annual household income (RMB, in quartiles) |                    |             |             |             |             |         |
| <20000                                      | 44.39±11.11        | 43.55±10.16 | 42.79±9.56  | 42.12±9.78  | 42.12±10.07 | <.0001  |
| 20000~                                      | 43.39±10.60        | 44.22±9.42  | 43.47±9.38  | 42.50±9.66  | 42.59±9.49  | <.0001  |
| 26000~                                      | 45.13±10.60        | 44.79±9.93  | 44.07±9.41  | 43.08±9.76  | 42.62±9.69  | <.0001  |
| ≥36000                                      | 45.67±9.32         | 44.94±9.54  | 44.43±9.13  | 43.98±9.55  | 43.71±9.47  | <.0001  |
| Inflow area                                 |                    |             |             |             |             |         |
| South                                       | 44.14±9.87         | 43.65±9.33  | 43.05±9.00  | 42.21±9.64  | 41.89±9.54  | <.0001  |
| North                                       | 45.30±10.80        | 45.14±10.05 | 44.44±9.63  | 43.77±9.66  | 43.66±9.59  | <.0001  |
| Migration time (year)                       |                    |             |             |             |             |         |
| <2                                          | 44.63±9.32         | 44.73±10.16 | 44.13±9.40  | 43.06±9.75  | 43.13±9.78  | <.0001  |
| 2~                                          | 44.99±10.29        | 44.75±10.24 | 43.87±9.58  | 42.93±9.64  | 42.69±10.15 | <.0001  |
| 4.5~                                        | 43.81±11.40        | 44.03±9.39  | 43.47±8.97  | 42.68±9.71  | 42.46±9.34  | <.0001  |
| ≥10                                         | 45.15±10.19        | 44.29±9.36  | 43.69±9.44  | 43.45±9.68  | 42.99±9.40  | <.0001  |
| Working hours(h)                            |                    |             |             |             |             |         |
| <8                                          | 45.91±13.26        | 44.43±11.11 | 44.14±9.80  | 42.44±10.37 | 42.48±9.47  | 0.0005  |
| 8~                                          | 44.15±10.33        | 44.31±9.83  | 43.68±9.29  | 42.90±9.72  | 42.79±9.90  | <.0001  |
| ≥10                                         | 45.27±9.67         | 44.59±9.34  | 43.87±9.37  | 43.41±9.48  | 42.93±9.31  | <.0001  |

|                                           |             |             |             |             |             |        |
|-------------------------------------------|-------------|-------------|-------------|-------------|-------------|--------|
| Total static behavior time (h)            |             |             |             |             |             |        |
| <4                                        | 44.96±9.88  | 45.00±9.87  | 44.12±9.38  | 43.71±9.67  | 43.42±10.01 | <.0001 |
| ≥4                                        | 44.44±10.79 | 43.90±9.60  | 43.48±9.32  | 42.51±9.69  | 42.36±9.45  | <.0001 |
| BMI                                       |             |             |             |             |             |        |
| <18.5                                     | 44.40±10.44 | 43.91±9.85  | 43.03±9.14  | 42.15±9.52  | 42.11±9.60  | <.0001 |
| 18.5-23.9                                 | 44.92±10.00 | 45.21±9.32  | 44.83±9.42  | 44.46±9.71  | 44.43±9.67  | 0.0277 |
| ≥24                                       | 47.74±10.53 | 45.73±10.28 | 46.88±10.24 | 46.88±10.19 | 47.03±9.85  | 0.4182 |
| Smoking status                            |             |             |             |             |             |        |
| Non-current smoker                        | 45.90±9.96  | 45.81±9.31  | 45.94±9.04  | 45.65±9.52  | 45.67±9.92  | 0.3607 |
| Current smoker                            | 43.92±10.51 | 43.46±9.91  | 42.63±9.31  | 41.84±9.54  | 41.58±9.35  | <.0001 |
| Alcohol consumption in the past 12 months |             |             |             |             |             |        |
| Never drinking                            | 43.69±11.20 | 43.61±10.41 | 42.73±9.49  | 41.78±9.62  | 41.65±9.62  | <.0001 |
| Drinking but not excessive                | 45.01±9.14  | 44.68±9.10  | 44.26±9.07  | 44.00±9.50  | 43.61±9.62  | 0.0001 |
| Excessive drinking                        | 46.59±10.32 | 45.98±9.43  | 46.07±9.38  | 45.62±9.99  | 45.90±9.52  | 0.3490 |
| Vegetable and fruit intake                |             |             |             |             |             |        |
| Insufficient intake                       | 44.44±10.96 | 44.67±10.17 | 43.84±9.27  | 43.17±9.72  | 43.21±9.88  | <.0001 |
| Adequate intake                           | 44.91±9.84  | 44.22±9.37  | 43.72±9.41  | 42.91±9.67  | 42.50±9.56  | <.0001 |
| Red meat intake                           |             |             |             |             |             |        |
| Normal intake                             | 44.25±10.68 | 44.61±10.28 | 43.61±9.54  | 43.06±9.57  | 42.86±9.58  | <.0001 |
| Excessive intake                          | 45.06±10.04 | 44.28±9.33  | 43.89±9.22  | 42.99±9.79  | 42.77±9.80  | <.0001 |
| Participants with diabetes                |             |             |             |             |             |        |
| Yes                                       | 52.39±12.29 | 49.29±12.64 | 48.67±12.75 | 48.19±12.45 | 46.04±12.35 | 0.0301 |
| No                                        | 44.52±10.21 | 44.31±9.64  | 43.71±9.28  | 42.95±9.64  | 42.77±9.67  | <.0001 |
| Stroke patients                           |             |             |             |             |             |        |
| Yes                                       | 56.33±11.53 | 49.04±11.99 | 50.24±15.43 | 46.11±18.37 | 54.37±14.36 | 0.4936 |
| No                                        | 44.66±10.30 | 44.41±9.74  | 43.77±9.34  | 43.02±9.68  | 42.80±9.70  | <.0001 |
| Myocardial infarction patients            |             |             |             |             |             |        |
| Yes                                       | 43.42±13.07 | 50.61±6.11  | 44.41±17.69 | 42.29±8.28  | 47.62±13.58 | 0.8131 |
| No                                        | 44.72±10.32 | 44.41±9.74  | 43.77±9.35  | 43.02±9.70  | 42.81±9.70  | <.0001 |
| Total                                     | 44.71±10.33 | 44.42±9.74  | 43.77±9.35  | 43.02±9.70  | 42.81±9.70  | <.0001 |

Note: Data were expressed as ( $\bar{x} \pm s$  (mm Hg))

The *p*-values were calculated from weighted linear regression to test for differences across sleep duration categories.

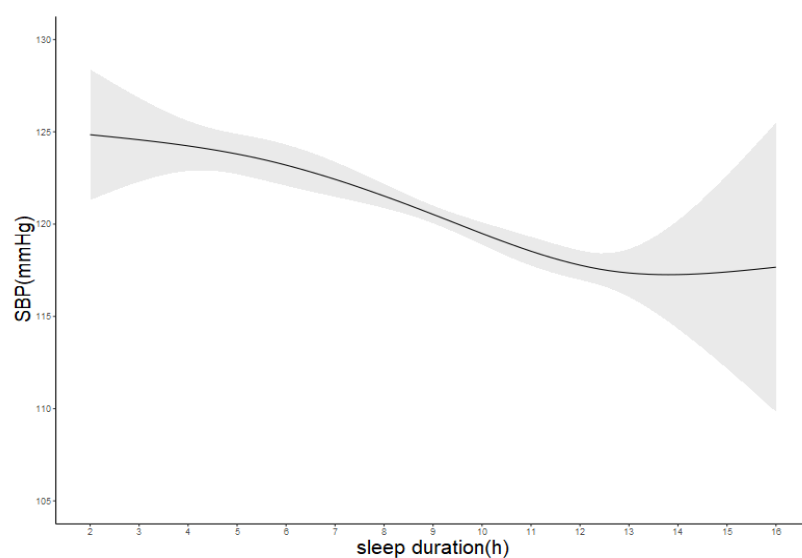

**Figure S1 The Relationship between Sleep Duration and Systolic Blood Pressure**

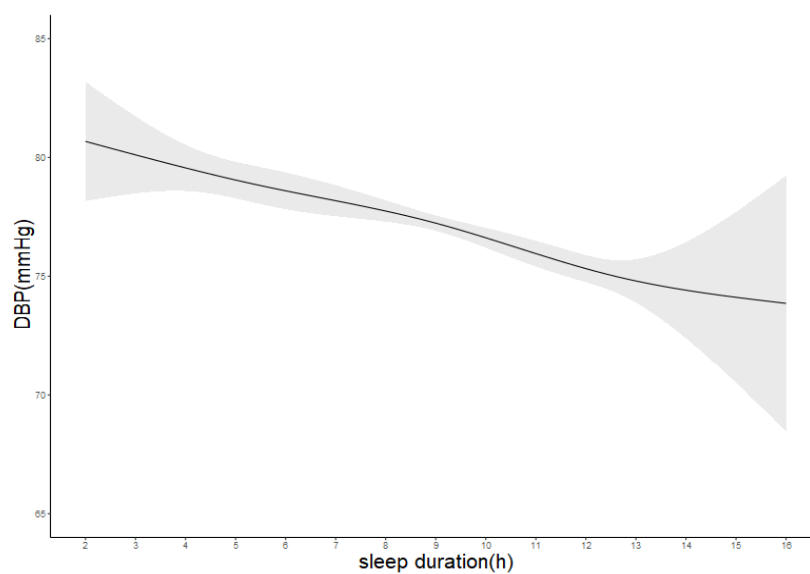

**Figure S2 The Relationship between Sleep Duration and Diastolic Blood Pressure**

**Note:** Generalized additive model was used to present the spines between the sleep duration (continuous variable) and the blood pressure and the light grey background indicates the 95% confidence interval in Figure S1 and Figure S2.

Table S4 Association between sleep duration and hypertension  
by sex, age and migration time

| aModel 1   |                    |                         | bModel 2               |                    |                         | cModel 3               |                     |                         |                        |
|------------|--------------------|-------------------------|------------------------|--------------------|-------------------------|------------------------|---------------------|-------------------------|------------------------|
|            | OR                 | <i>P</i> value post-hoc | <i>P</i> value overall | OR                 | <i>P</i> value post-hoc | <i>P</i> value overall | OR                  | <i>P</i> value post-hoc | <i>P</i> value overall |
| Sex        |                    |                         |                        |                    |                         |                        |                     |                         |                        |
| Male       |                    |                         |                        |                    |                         |                        |                     |                         |                        |
| <6 h       | 1.34(1.10 to 1.63) | 0.0034                  | <.0001                 | 1.27(1.04 to 1.56) | 0.0183                  | 0.0017                 | 1.26(1.03 to 1.54)  | 0.0267                  | 0.0027                 |
| 6 h        | 1.10(0.97 to 1.24) | 0.1357                  |                        | 1.04(0.91 to 1.18) | 0.5889                  |                        | 1.03(0.90 to 1.17)  | 0.6922                  |                        |
| 7 h        | 1.00               | ref                     |                        | 1.00               | ref                     |                        | 1.00                | ref                     |                        |
| 8 h        | 0.94(0.86 to 1.03) | 0.1843                  |                        | 0.97(0.88 to 1.06) | 0.5054                  |                        | 0.97(0.88 to 1.06)  | 0.4830                  |                        |
| ≥9 h       | 0.78(0.69 to 0.88) | <.0001                  |                        | 0.85(0.75 to 0.96) | 0.0080                  |                        | 0.85(0.75 to 0.96)  | 0.0076                  |                        |
| Female     |                    |                         |                        |                    |                         |                        |                     |                         |                        |
| <6 h       | 1.89(1.43 to 2.51) | <.0001                  | <.0001                 | 1.59(1.19 to 2.14) | 0.0020                  | <.0001                 | 1.55 (1.13 to 2.06) | 0.0051                  | 0.0004                 |
| 6 h        | 1.40(1.15 to 1.71) | 0.0010                  |                        | 1.26(1.02 to 1.55) | 0.0315                  |                        | 1.23(0.99 to 1.52)  | 0.0548                  |                        |
| 7 h        | 1.00               | ref                     |                        | 1.00               | ref                     |                        | 1.00                | ref                     |                        |
| 8 h        | 0.95(0.82 to 1.11) | 0.5386                  |                        | 0.99(0.85 to 1.15) | 0.8689                  |                        | 0.99(0.85 to 1.15)  | 0.8947                  |                        |
| ≥9 h       | 0.77(0.63 to 0.96) | 0.0055                  |                        | 0.83(0.68 to 0.99) | 0.0427                  |                        | 0.82(0.67 to 0.99)  | 0.0407                  |                        |
| Age group  |                    |                         |                        |                    |                         |                        |                     |                         |                        |
| 18-44 year |                    |                         |                        |                    |                         |                        |                     |                         |                        |
| <6 h       | 1.25(0.99 to 1.57) | 0.0634                  | <.0001                 | 1.17(0.92 to 1.48) | 0.2006                  | 0.0070                 | 1.14(0.89 to 1.43)  | 0.3102                  | 0.0112                 |
| 6 h        | 1.11(0.97 to 1.27) | 0.1357                  |                        | 1.01(0.88 to 1.17) | 0.8559                  |                        | 1.00(0.86 to 1.15)  | 0.9802                  |                        |
| 7 h        | 1.00               | ref                     |                        | 1.00               | ref                     |                        | 1.00                | ref                     |                        |
| 8 h        | 0.91(0.84 to 1.00) | 0.1843                  |                        | 0.97(0.88 to 1.07) | 0.5051                  |                        | 0.96(0.87 to 1.06)  | 0.4582                  |                        |



|                |                    |        |        |                    |        |        |                    |        |        |
|----------------|--------------------|--------|--------|--------------------|--------|--------|--------------------|--------|--------|
| ≥9 h           | 0.72(0.64 to 0.82) | <.0001 |        | 0.82(0.71 to 0.92) | 0.0021 |        | 0.82(0.72 to 0.93) | 0.0019 |        |
| 45-59 year     |                    |        |        |                    |        |        |                    |        |        |
| <6 h           | 1.22(0.99 to 1.50) | 0.0726 |        | 1.28(0.93 to 1.58) | 0.0749 |        | 1.28(0.95 to 1.58) | 0.0782 |        |
| 6 h            | 1.16(0.99 to 1.35) | 0.0548 |        | 1.15(0.98 to 1.35) | 0.0908 |        | 1.15(0.98 to 1.35) | 0.0967 |        |
| 7 h            | 1.00               | ref    | 0.1870 | 1.00               | ref    | 0.1713 | 1.00               | ref    | 0.1794 |
| 8 h            | 1.06(0.94 to 1.21) | 0.5386 |        | 1.10(0.97 to 1.25) | 0.1466 |        | 1.10(0.97 to 1.26) | 0.1380 |        |
| ≥9 h           | 1.03(0.87 to 1.21) | 0.5549 |        | 1.08(0.89 to 1.26) | 0.4020 |        | 1.07(0.90 to 1.27) | 0.4603 |        |
| Migration time |                    |        |        |                    |        |        |                    |        |        |
| <4.5 year      |                    |        |        |                    |        |        |                    |        |        |
| <6 h           | 1.41(1.08 to 1.10) | 0.0069 |        | 1.25(0.96 to 1.62) | 0.0967 |        | 1.08(0.83 to 1.43) | 0.1853 |        |
| 6 h            | 1.28(1.09 to 1.51) | 0.0023 |        | 1.23(1.03 to 1.46) | 0.0199 |        | 1.16(0.98 to 1.40) | 0.0858 |        |
| 7 h            | 1.00               | ref    | <.0001 | 1.00               | ref    | <.0001 | 1.00               | ref    | <.0001 |
| 8 h            | 0.88(0.79 to 0.99) | 0.0334 |        | 0.96(0.85 to 1.08) | 0.4503 |        | 0.99(0.87 to 1.12) | 0.4065 |        |
| ≥9 h           | 0.65(0.56 to 0.76) | <.0001 |        | 0.75(0.64 to 0.88) | 0.0004 |        | 0.80(0.68 to 0.94) | 0.0003 |        |
| ≥4.5 year      |                    |        |        |                    |        |        |                    |        |        |
| <6 h           | 1.50(1.22 to 1.84) | 0.0001 |        | 1.41(1.14 to 1.76) | 0.0020 |        | 1.29(1.01 to 1.61) | 0.0031 |        |
| 6 h            | 1.14(0.99 to 1.31) | 0.0657 |        | 1.02(0.89 to 1.18) | 0.7603 |        | 0.95(0.82 to 1.10) | 0.9060 |        |
| 7 h            | 1.00               | ref    | <.0001 | 1.00               | ref    | 0.0010 | 1.00               | ref    | 0.0022 |
| 8 h            | 0.94(0.84 to 1.04) | 0.2051 |        | 0.96(0.86 to 1.07) | 0.4405 |        | 0.99(0.89 to 1.11) | 0.4703 |        |
| ≥9 h           | 0.81(0.70 to 0.92) | 0.0017 |        | 0.87(0.75 to 0.99) | 0.0443 |        | 0.92(0.80 to 1.06) | 0.0691 |        |
| Total          |                    |        |        |                    |        |        |                    |        |        |
| <6 h           | 1.46(1.25 to 1.72) | <.0001 |        | 1.22(1.02 to 1.45) | 0.0286 |        | 1.20(1.01 to 1.43) | 0.0440 |        |
| 6 h            | 1.21(1.09 to 1.34) | 0.0005 |        | 1.04(0.92 to 1.16) | 0.5452 |        | 1.03(0.92 to 1.15) | 0.6497 |        |
| 7 h            | 1.00               | ref    | <.0001 | 1.00               | ref    | 0.0027 | 1.00               | ref    | 0.0039 |
| 8 h            | 0.90(0.83 to 0.97) | 0.0052 |        | 0.99(0.92 to 1.08) | 0.9618 |        | 1.00(0.92 to 1.08) | 0.9335 |        |
| ≥9 h           | 0.71(0.65 to 0.79) | <.0001 |        | 0.87(0.78 to 0.97) | 0.0095 |        | 0.87(0.78 to 0.96) | 0.0083 |        |

Note: <sup>a</sup>Model 1: unadjusted.

<sup>b</sup>Model 2: adjusted for other sociodemographic information in each subgroup such as sex, age migration time, marital status, education level, annual income, inflow area, working time, static behavior time, smoking status, alcohol consumption, red meat intake, vegetable and fruit intake and BMI.

<sup>c</sup>Model 3: adjusted for the variables in Model 2 plus diabetes, stroke and myocardial infarction.
